# Supplementary material
Source: Royal Society of Chemistry journal article supplement (doi:10.1039/d6cp00608f)
Supplement: d6cp00608f1.pdf [file d6cp00608f1.pdf]

**Supplementary Information for  
Vibrational infrared and Raman spectra of the methanol molecule with  
equivariant neural-network property surfaces**

Ayaki Sunaga,<sup>1</sup> Albert P. Bartók,<sup>2,3</sup> and Edit Mátyus<sup>1,\*</sup>

<sup>1</sup>*ELTE, Eötvös Loránd University, Institute of Chemistry,  
Pázmány Péter sétány 1/A 1117 Budapest, Hungary*

<sup>2</sup>*Department of Physics, University of Warwick, Coventry, CV4 7AL, UK*

<sup>3</sup>*Warwick Centre for Predictive Modelling, School of Engineering,  
University of Warwick, Coventry, CV4 7AL, UK*

(Dated: April 8, 2026)

**CONTENTS**

|                                                                             |    |
|-----------------------------------------------------------------------------|----|
| S1. Development process of the property surfaces                            | 2  |
| S2. Convergence test with the number of geometry points in the training set | 3  |
| S3. Assignment of the vibrational states and comparison with experiment     | 6  |
| References                                                                  | 13 |

---

\* [edit.matyus@ttk.elte.hu](mailto:edit.matyus@ttk.elte.hu)

## S1. DEVELOPMENT PROCESS OF THE PROPERTY SURFACES

To obtain the training sets for fitting and test sets for evaluating the surfaces' quality, we first carry out the electronic structure computation for the 39 401 geometries in the fitting set obtained in Ref. 1. The property surface of the  $\alpha_{zz}$  component was unstable when we performed the fit using all the geometry points. Therefore, we extracted the nine geometries that showed negative eigenvalues during the linear response computation of polarizability; these points corresponded to largely distorted structures, and the  $|\alpha_{zz}|$  values exceeded  $90 e^2 a_0^2 E_h^{-1}$ . In the end, we included 35 000 geometries in the training set, and the remaining 4 392 geometries formed the test set. These geometries were randomly extracted from the total 39 392 geometries, and three randomly extracted sets were tested. The qualities of these surfaces are summarized in Tables S1 and S2. The key input parameters of MACE employed in the fitting are provided in Table 1 of the main text.

Based on comparison of the developed property surfaces, SET1 is employed for the dipole moment surface, and SET3 is employed for the polarizability surface in the computation shown in the main text and in the following sections. However, no significant difference is observed in the RMSE errors of the different SETs. This observation suggests that the results are insensitive to precise manner the geometry points are extracted from the geometry set of 39 401 points. The accuracy of the dipole moment and polarizability surfaces obtained with SET1-3 is sufficient and comparable to that of the quantum-chemical computations.

The dependence of the training results on hyperparameters is provided in Tables S3 and S4. Although slight improvement (*i.e.*, the decrease of the RMSE and MAPE) is observed in the polarizability surface trained with  $B = 64$  and  $\nu = 4$  compared with those listed in Tables S1 and S2, the parameter dependence is much smaller than the diagonal components at the equilibrium, ca.  $20 e^2 a_0^2 E_h^{-1}$  (Table 2 of the main text). For the dipole moment surfaces, the parameters employed in (SET1) are the best choice among the parameters investigated in Tables S1 and S2.

The MACE program<sup>2</sup> at commit hash a8f2f6cd64e7 was used for the fitting of the property surfaces.

TABLE S1. Root mean square error (RMSE) of the polarizability and dipole moment surfaces for methanol in  $e^2 a_0^2 E_h^{-1}$  for polarizability and  $ea_0$  for dipole moment, fitted by the MACE program. The *ab initio* values are obtained at the CCSD/aug-cc-pVTZ level of theory.

|               | polarizability |           |           |           |           |           | dipole moment |          |          |
|---------------|----------------|-----------|-----------|-----------|-----------|-----------|---------------|----------|----------|
|               | <i>xx</i>      | <i>yy</i> | <i>zz</i> | <i>xy</i> | <i>yz</i> | <i>xz</i> | <i>x</i>      | <i>y</i> | <i>z</i> |
| SET1 training | 0.047          | 0.053     | 0.087     | 0.029     | 0.048     | 0.032     | 0.0018        | 0.0028   | 0.0028   |
| test          | 0.049          | 0.056     | 0.103     | 0.028     | 0.048     | 0.029     | 0.0018        | 0.0026   | 0.0031   |
| SET2 training | 0.048          | 0.054     | 0.082     | 0.029     | 0.046     | 0.032     | 0.0020        | 0.0030   | 0.0030   |
| test          | 0.044          | 0.048     | 0.080     | 0.031     | 0.044     | 0.029     | 0.0018        | 0.0035   | 0.0030   |
| SET3 training | 0.048          | 0.052     | 0.079     | 0.029     | 0.046     | 0.032     | 0.0019        | 0.0028   | 0.0029   |
| test          | 0.049          | 0.057     | 0.080     | 0.028     | 0.046     | 0.030     | 0.0017        | 0.0026   | 0.0029   |

TABLE S2. Mean absolute percentage error (MAPE, %) of the polarizability and dipole moment surfaces for methanol, fitted by MACE program. The *ab initio* values are obtained at the CCSD/aug-cc-pVTZ level of theory.

|               | polarizability |           |           |           |           |           | dipole moment |          |          |
|---------------|----------------|-----------|-----------|-----------|-----------|-----------|---------------|----------|----------|
|               | <i>xx</i>      | <i>yy</i> | <i>zz</i> | <i>xy</i> | <i>yz</i> | <i>xz</i> | <i>x</i>      | <i>y</i> | <i>z</i> |
| SET1 training | 0.15           | 0.16      | 0.16      | 21.82     | 19.97     | 17.22     | 42.95         | 0.41     | 1.34     |
| test          | 0.15           | 0.16      | 0.16      | 53.84     | 17.50     | 20.63     | 20.86         | 0.40     | 1.05     |
| SET2 training | 0.15           | 0.16      | 0.16      | 20.54     | 17.12     | 18.81     | 54.47         | 0.42     | 1.58     |
| test          | 0.15           | 0.16      | 0.16      | 41.98     | 14.52     | 21.66     | 24.73         | 0.48     | 1.00     |
| SET3 training | 0.15           | 0.16      | 0.16      | 27.11     | 19.06     | 18.68     | 26.48         | 0.41     | 1.24     |
| test          | 0.16           | 0.16      | 0.16      | 19.79     | 29.20     | 16.00     | 175.37        | 0.42     | 1.19     |

TABLE S3. Root mean square error (RMSE) of the polarizability, in  $e^2 a_0^2 E_h^{-1}$ , and dipole moment, in  $ea_0$ , fitted with the MACE program using various hyperparameters.  $B$ : batch size,  $\nu$ : correlation order. All other parameters are the same as in Table 1 of the main text. The *ab initio* values are obtained at the CCSD/aug-cc-pVTZ level of theory.

|           |          | $xx$  | $yy$  | $zz$  | $xy$  | $yz$  | $xz$  | $x$    | $y$    | $z$    |
|-----------|----------|-------|-------|-------|-------|-------|-------|--------|--------|--------|
| $B = 64$  | training | 0.055 | 0.060 | 0.087 | 0.033 | 0.033 | 0.037 | 0.0024 | 0.0035 | 0.0034 |
|           | test     | 0.055 | 0.064 | 0.084 | 0.031 | 0.031 | 0.032 | 0.0023 | 0.0033 | 0.0036 |
| $B = 16$  | training | 0.044 | 0.048 | 0.075 | 0.027 | 0.027 | 0.029 | 0.0021 | 0.0029 | 0.0029 |
|           | test     | 0.044 | 0.052 | 0.077 | 0.027 | 0.027 | 0.028 | 0.0021 | 0.0028 | 0.0030 |
| $\nu = 4$ | training | 0.039 | 0.046 | 0.067 | 0.025 | 0.025 | 0.030 | 0.0020 | 0.0029 | 0.0028 |
|           | test     | 0.046 | 0.055 | 0.063 | 0.024 | 0.024 | 0.027 | 0.0019 | 0.0028 | 0.0028 |

TABLE S4. Mean absolute percentage error (MAPE, %) of the polarizability and dipole moment surfaces for methanol, fitted with the MACE program using various hyperparameters.  $B$ : batch size,  $\nu$ : correlation order. All other parameters are the same as in Table 1 of the main text. The *ab initio* values are obtained at the CCSD/aug-cc-pVTZ level of theory.

|           |          | $xx$ | $yy$ | $zz$ | $xy$  | $yz$  | $xz$  | $x$   | $y$  | $z$  |
|-----------|----------|------|------|------|-------|-------|-------|-------|------|------|
| $B = 64$  | training | 0.18 | 0.18 | 0.17 | 28.40 | 28.40 | 21.01 | 91.97 | 0.52 | 1.58 |
|           | test     | 0.18 | 0.18 | 0.17 | 20.63 | 20.63 | 20.92 | 30.62 | 0.54 | 1.06 |
| $B = 16$  | training | 0.14 | 0.14 | 0.15 | 19.26 | 19.26 | 16.59 | 72.35 | 0.44 | 1.34 |
|           | test     | 0.14 | 0.15 | 0.15 | 19.14 | 19.14 | 19.03 | 26.59 | 0.46 | 0.91 |
| $\nu = 4$ | training | 0.12 | 0.14 | 0.14 | 22.62 | 22.62 | 18.00 | 73.14 | 0.43 | 1.31 |
|           | test     | 0.13 | 0.15 | 0.14 | 26.36 | 26.36 | 17.35 | 23.80 | 0.43 | 0.95 |

## S2. CONVERGENCE TEST WITH THE NUMBER OF GEOMETRY POINTS IN THE TRAINING SET

The convergence with respect to the number of geometry points was investigated using SET1 for dipole moment and SET3 for polarizability. We designed the training set with fewer geometries to be a subset of the training set with more geometries. For example, the training set with 30 000 geometries (geometries in the test set) was obtained by randomly extracting 5 000 geometries from the 35 000 geometries in the training set and moving them to the test set (FIGs. S1 and S2).

The RMSE basically decreases as the number of geometry points in the training set increases. The error is not monotonically decreasing due to largely distorted geometries, picked randomly in the training/test sets. Most components are converged with respect to the number of geometries, but the RMSE of the off-diagonal components of  $\alpha_{ij}$  could be decreased further. However, since the RMSE errors of the off-diagonal part are sufficiently smaller than the diagonal errors, we do not have to increase the number of geometries. We should note that the components with large values (the  $y$  and  $z$  components of  $\mu$  and the diagonal components of  $\alpha_{ij}$ ) are converged with a smaller number of geometry points: approximately 20 000 geometries (5000 geometries) are sufficient to achieve the error below 2% (1%) of the  $\mu$  ( $\alpha_{ii}$ ). The components with small values (the  $x$  component of  $\mu$  and the off-diagonal components of  $\alpha_{ij}$ ) show relatively large MAPEs because some of their values are close to zero.

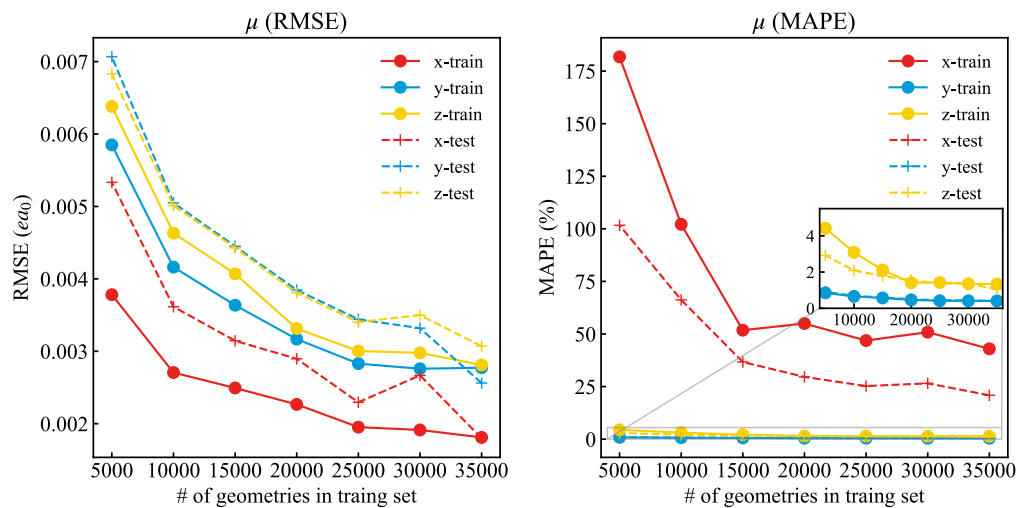

FIG. S1. RMSE in  $ea_0$  and MAPE in % for the training set and test set obtained with dipole moment surface of the methanol molecule. The data points were computed at the CCSD/aug-cc-pVTZ level of theory.

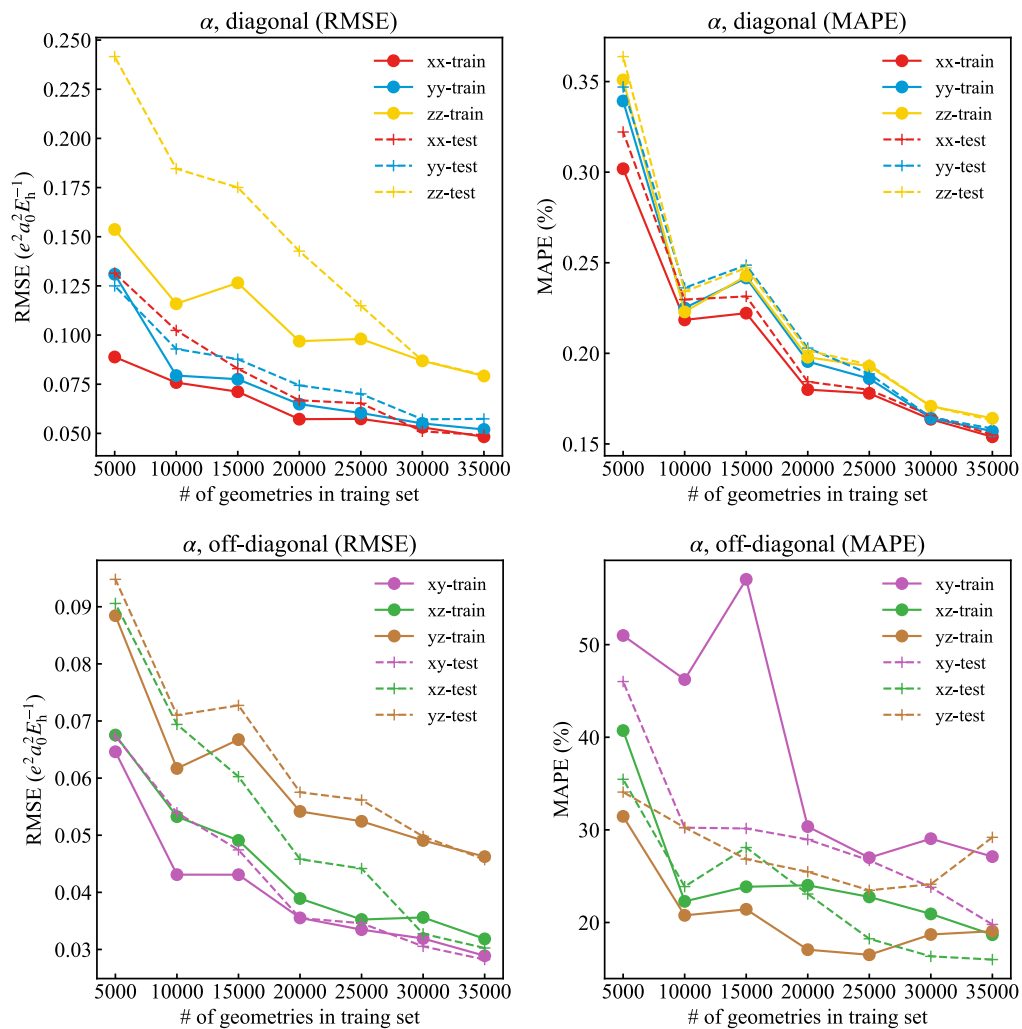

FIG. S2. RMSE in  $e^2 a_0^2 E_h^{-1}$  and MAPE in % for the training set and test set obtained with polarizability surface for the methanol molecule. The data points were computed at the CCSD/aug-cc-pVTZ level of theory.

### S3. ASSIGNMENT OF THE VIBRATIONAL STATES AND COMPARISON WITH EXPERIMENT

In Tables S6-S11, we list the vibrational states up to the OH stretching fundamental vibrational as obtained with the GENIUSH-Smolyak method ( $b = 7$  vibrational basis<sup>3</sup> and PES2025<sup>1</sup>) and available data originating from gas-phase experiment. The first 150 vibrational states were already listed in the Tables S7–S9 of Ref. 1. We extend it with the further 525 states obtained since the publication of that paper. Table S5 lists the harmonic frequencies of PES2025<sup>1</sup> and corresponding labels, which allows us to define the vibrational labels used to assign the variational vibrational states.

The vibrational energies of the fundamental modes are listed in Table 3 of the main text, but we note that strong torsion-vibration mixing is observed for  $\nu_6$  (No. 25-27), whereas mode coupling is observed for  $\nu_7$  (No. 17-19),  $\nu_3$  (No. 265, 268-269), and  $\nu_2$  (No. 311-313). The importance of coupling of  $3_1$  and  $5_2$  (No. 265), and  $9_1$  and  $4_1 + 10_1$  (No. 313) was already pointed out in a vibrational configurational interaction computation (Table S3 of Ref. 4). The coupling between the torsional and CH stretch motion was also investigated in Refs. 5 and 6.

TABLE S5. Harmonic frequencies corresponding to PES2025<sup>1</sup> used in this work.  $\Gamma$  is the symmetry label (deliberately in small letters referring to ‘single mode’) corresponding to the  $C_{3v}(M)$  molecular symmetry group.

| Label      | Description                         | coord                 | $\Gamma$ | $\tilde{\nu}$ [cm <sup>-1</sup> ] |
|------------|-------------------------------------|-----------------------|----------|-----------------------------------|
| $\nu_1$    | $\nu(\text{OH})$                    | $r_{\text{OH}}$       | $a_1$    | 3864.31                           |
| $\nu_2$    | $\nu(\text{CH}_3)_{\text{asym}}$    | $r_{\text{CH}}$       | $e$      | 3099.06                           |
| $\nu_9$    | $\nu(\text{CH}_3)_{\text{asym}}$    | $r_{\text{CH}}$       | $e$      | 3099.06                           |
| $\nu_3$    | $\nu(\text{CH}_3)_{\text{sym}}$     | $r_{\text{CH}}$       | $a_1$    | 3024.56                           |
| $\nu_4$    | $\delta(\text{CH}_3)_{\text{asym}}$ | $\varphi_2$           | $e$      | 1517.64                           |
| $\nu_{10}$ | $\delta(\text{CH}_3)_{\text{asym}}$ | $\varphi_1$           | $e$      | 1517.64                           |
| $\nu_5$    | $\delta(\text{CH}_3)_{\text{sym}}$  | $\theta_{\text{HCO}}$ | $a_1$    | 1486.35                           |
| $\nu_6$    | $\delta(\text{COH})$                | $\theta_{\text{COH}}$ | $a_1$    | 1280.06                           |
| $\nu_{11}$ | $\rho(\text{CH}_3)$                 | $\theta_{\text{HCO}}$ | $e$      | 1183.72                           |
| $\nu_7$    | $\rho(\text{CH}_3)$                 | $\theta_{\text{HCO}}$ | $e$      | 1183.72                           |
| $\nu_8$    | $\nu(\text{CO})$                    | $r_{\text{CO}}$       | $a_1$    | 1076.05                           |

TABLE S6. Vibrational energies,  $\tilde{\nu}_{\text{PES}}$  in  $\text{cm}^{-1}$ , referenced to the zero-point vibrational energy (ZPVE,  $11119.58 \text{ cm}^{-1}$ ) of  $\text{CH}_3\text{OH}$  in 12D computed with the GENIUSH-Smolyak program with the  $b = 7$  basis set and using PES2025.<sup>1</sup> The first 150 vibrational states are listed in Tables S7-S9 of the Supplementary Material of Ref. 1. Comparison with the vibrational band origins derived from (gas-phase) experiment is shown as  $\delta = \tilde{\nu}_{\text{exp}} - \tilde{\nu}_{\text{PES}}$ , in  $\text{cm}^{-1}$ . SAMs: assignment of the curvilinear normal modes  $1_n, 2_n, \dots, 11_n$  ( $n = 0, 1, \dots$ ) (Table S5), no excitation ( $n = 0$ ) is noted as “0”. “[...]” labels the largest contribution(s) from strongly mixed states.  $\Gamma$ :  $C_{3v}(\text{M})$  label according to Table S5 and the irreducible representations of the torsional part. Further details are in Sec. S1 of the Supporting Information of Ref. 3. All degeneracies for the  $E$  states are converged better than  $0.01 \text{ cm}^{-1}$ , except for the pairs listed in the footnotes.

| #       | $\nu_\tau$ | SAMs                                                                   | $\Gamma$ | $\tilde{\nu}_{\text{PES}}$ | #       | $\nu_\tau$ | SAMs                                                                    | $\Gamma$ | $\tilde{\nu}_{\text{PES}}$ |
|---------|------------|------------------------------------------------------------------------|----------|----------------------------|---------|------------|-------------------------------------------------------------------------|----------|----------------------------|
| 151-152 | 0,2        | [11 <sub>1</sub> + 7 <sub>1</sub> , 6 <sub>1</sub> + 7 <sub>1</sub> ]  | $E$      | 2494.3                     | 208     | 1          | 6 <sub>2</sub>                                                          | $A_2$    | 2676.0                     |
| 153-154 | 4          | [4 <sub>1</sub> , 10 <sub>1</sub> ]                                    | $E$      | 2497.5                     | 209-210 | 1          | 5 <sub>1</sub> + 8 <sub>1</sub>                                         | $E$      | 2690.5                     |
| 155     | 3          | 5 <sub>1</sub>                                                         | $A_2$    | 2497.9                     | 211-212 | 2          | 7 <sub>1</sub> + 8 <sub>1</sub> , 11 <sub>1</sub> + 8 <sub>1</sub>      | $E$      | 2694.2                     |
| 156     | 4          | 5 <sub>1</sub>                                                         | $A_1$    | 2498.7                     | 213-214 | 2          | [7 <sub>2</sub> , 6 <sub>1</sub> + 7 <sub>1</sub> ]                     | $E$      | 2695.7                     |
| 157-158 | 0          | 4 <sub>1</sub> + 8 <sub>1</sub> , 10 <sub>1</sub> + 8 <sub>1</sub>     | $E$      | 2505.1                     | 215     | 1          | 10 <sub>1</sub> + 8 <sub>1</sub> , 4 <sub>1</sub> + 8 <sub>1</sub>      | $A_2$    | 2706.2                     |
| 159-160 | 2          | 7 <sub>1</sub> + 8 <sub>1</sub> , 11 <sub>1</sub> + 8 <sub>1</sub>     | $E$      | 2506.7                     | 216     | 1          | 4 <sub>1</sub> + 8 <sub>1</sub> , 10 <sub>1</sub> + 8 <sub>1</sub>      | $A_1$    | 2715.7                     |
| 161     | 0          | 4 <sub>1</sub> + 8 <sub>1</sub> , 10 <sub>1</sub> + 8 <sub>1</sub>     | $A_2$    | 2510.5                     | 217-218 | 1          | [4 <sub>1</sub> + 8 <sub>1</sub> , 10 <sub>1</sub> + 8 <sub>1</sub> ]   | $E$      | 2717.8                     |
| 162-163 | 0          | 4 <sub>1</sub> + 8 <sub>1</sub> , 10 <sub>1</sub> + 8 <sub>1</sub>     | $E$      | 2513.6                     | 219     | 2          | 6 <sub>2</sub>                                                          | $A_1$    | 2726.4                     |
| 164     | 0          | 10 <sub>1</sub> + 8 <sub>1</sub> , 4 <sub>1</sub> + 8 <sub>1</sub>     | $A_1$    | 2516.9                     | 220-221 | 1,2        | [6 <sub>2</sub> , 11 <sub>1</sub> + 7 <sub>1</sub> ]                    | $E$      | 2727.9                     |
| 165     | 0          | [5 <sub>1</sub> + 6 <sub>1</sub> , 5 <sub>1</sub> + 11 <sub>1</sub> ]  | $A_1$    | 2520.1                     | 222-223 | 6          | 0                                                                       | $E$      | 2733.6                     |
| 166-167 | 0          | [5 <sub>1</sub> + 11 <sub>1</sub> , 5 <sub>1</sub> + 6 <sub>1</sub> ]  | $E$      | 2523.5                     | 224-225 | 0          | 5 <sub>1</sub> + 6 <sub>1</sub>                                         | $E$      | 2744.5                     |
| 168-169 | 3,4        | 4 <sub>1</sub> , 10 <sub>1</sub>                                       | $E$      | 2532.1                     | 226     | 2          | [7 <sub>1</sub> + 8 <sub>1</sub> , 11 <sub>1</sub> + 8 <sub>1</sub> ]   | $A_2$    | 2745.0                     |
| 170-171 | 0          | [10 <sub>1</sub> + 7 <sub>1</sub> , 10 <sub>1</sub> + 6 <sub>1</sub> ] | $E$      | 2542.5                     | 227     | 2          | [6 <sub>1</sub> + 11 <sub>1</sub> , 6 <sub>1</sub> + 7 <sub>1</sub> ]   | $A_1$    | 2759.9                     |
| 172     | 0          | [10 <sub>1</sub> + 7 <sub>1</sub> , 4 <sub>1</sub> + 11 <sub>1</sub> ] | $A_2$    | 2545.4                     | 228     | 1          | [5 <sub>1</sub> + 8 <sub>1</sub> , 5 <sub>1</sub> + 11 <sub>1</sub> ]   | $A_2$    | 2760.8                     |
| 173-174 | 0          | [7 <sub>2</sub> , 4 <sub>1</sub> + 7 <sub>1</sub> ]                    | $E$      | 2548.0                     | 229     | 0,1        | [5 <sub>1</sub> + 6 <sub>1</sub> , 5 <sub>1</sub> + 11 <sub>1</sub> ]   | $A_1$    | 2764.8                     |
| 175     | 0          | [4 <sub>1</sub> + 7 <sub>1</sub> , 10 <sub>1</sub> + 11 <sub>1</sub> ] | $A_1$    | 2553.0                     | 230-231 | 0          | [10 <sub>1</sub> + 6 <sub>1</sub> , 4 <sub>1</sub> + 6 <sub>1</sub> ]   | $E$      | 2765.8                     |
| 176-177 | 1          | [11 <sub>1</sub> + 7 <sub>1</sub> , 11 <sub>2</sub> ]                  | $E$      | 2554.0                     | 232     | 0          | 4 <sub>1</sub> + 6 <sub>1</sub> , 10 <sub>1</sub> + 6 <sub>1</sub>      | $A_1$    | 2767.2                     |
| 178     | 2          | [6 <sub>1</sub> + 8 <sub>1</sub> , 7 <sub>1</sub> + 8 <sub>1</sub> ]   | $A_1$    | 2562.5                     | 233     | 1          | 5 <sub>1</sub> + 8 <sub>1</sub>                                         | $A_2$    | 2769.3                     |
| 179-180 | 4          | 11 <sub>1</sub> , 7 <sub>1</sub>                                       | $E^a$    | 2566.2                     | 234-235 | 2          | 6 <sub>1</sub> + 8 <sub>1</sub>                                         | $E$      | 2773.8                     |
| 181     | 4          | 11 <sub>1</sub> , 7 <sub>1</sub>                                       | $A_2$    | 2567.6                     | 236     | 2          | [6 <sub>1</sub> + 8 <sub>1</sub> , 11 <sub>1</sub> + 8 <sub>1</sub> ]   | $A_1$    | 2776.5                     |
| 182     | 1          | 6 <sub>1</sub> + 8 <sub>1</sub>                                        | $A_2$    | 2571.3                     | 237     | 1          | [6 <sub>1</sub> + 7 <sub>1</sub> , 6 <sub>1</sub> + 11 <sub>1</sub> ]   | $A_2$    | 2779.7                     |
| 183-184 | 2          | 8 <sub>2</sub>                                                         | $E$      | 2574.3                     | 238-239 | 0,1        | [4 <sub>1</sub> + 6 <sub>1</sub> , 4 <sub>1</sub> + 7 <sub>1</sub> ]    | $E$      | 2780.8                     |
| 185     | 4          | 11 <sub>1</sub> , 7 <sub>1</sub>                                       | $A_1$    | 2575.4                     | 240-241 | 1          | 10 <sub>1</sub> + 8 <sub>1</sub> , 5 <sub>1</sub> + 6 <sub>1</sub>      | $E$      | 2788.9                     |
| 186     | 4          | [7 <sub>1</sub> , 11 <sub>1</sub> ]                                    | $A_2$    | 2585.9                     | 242     | 1          | 5 <sub>1</sub> + 8 <sub>1</sub>                                         | $A_2$    | 2790.5                     |
| 187     | 2          | 6 <sub>1</sub> + 8 <sub>1</sub>                                        | $A_1$    | 2588.7                     | 243-244 | 1          | [4 <sub>1</sub> + 11 <sub>1</sub> , 5 <sub>1</sub> + 6 <sub>1</sub> ]   | $E$      | 2793.9                     |
| 188-189 | 1,2        | [6 <sub>2</sub> , 6 <sub>1</sub> + 7 <sub>1</sub> ]                    | $E$      | 2589.9                     | 245-246 | 3          | 8 <sub>2</sub>                                                          | $E$      | 2800.7                     |
| 190-191 | 0          | 5 <sub>1</sub> + 7 <sub>1</sub>                                        | $E$      | 2597.5                     | 247     | 1          | 10 <sub>1</sub> + 6 <sub>1</sub> , 4 <sub>1</sub> + 6 <sub>1</sub>      | $A_2$    | 2806.5                     |
| 192     | 0          | 5 <sub>1</sub> + 7 <sub>1</sub> , 5 <sub>1</sub> + 11 <sub>1</sub>     | $A_2$    | 2603.0                     | 248     | 1          | 4 <sub>1</sub> + 6 <sub>1</sub> , 10 <sub>1</sub> + 6 <sub>1</sub>      | $A_1$    | 2809.4                     |
| 193-194 | 1          | 6 <sub>1</sub> + 8 <sub>1</sub>                                        | $E$      | 2606.1                     | 249-250 | 1          | [4 <sub>1</sub> + 8 <sub>1</sub> , 10 <sub>1</sub> + 6 <sub>1</sub> ]   | $E$      | 2810.3                     |
| 195-196 | 1,2        | 11 <sub>1</sub> + 7 <sub>1</sub>                                       | $E$      | 2616.1                     | 251-252 | 1          | 4 <sub>1</sub> + 8 <sub>1</sub> , 10 <sub>1</sub> + 8 <sub>1</sub>      | $E$      | 2812.3                     |
| 197     | 0          | 10 <sub>1</sub> + 11 <sub>1</sub> , 4 <sub>1</sub> + 7 <sub>1</sub>    | $A_1$    | 2618.6                     | 253     | 0          | [5 <sub>1</sub> + 11 <sub>1</sub> , 5 <sub>1</sub> + 7 <sub>1</sub> ]   | $A_1$    | 2816.2                     |
| 198-199 | 0          | 4 <sub>1</sub> + 7 <sub>1</sub> , 10 <sub>1</sub> + 11 <sub>1</sub>    | $E$      | 2621.5                     | 254     | 2          | 11 <sub>1</sub> + 7 <sub>1</sub>                                        | $A_2$    | 2816.8                     |
| 200     | 0          | [10 <sub>1</sub> + 7 <sub>1</sub> , 4 <sub>1</sub> + 11 <sub>1</sub> ] | $A_2$    | 2624.3                     | 255     | 2          | 11 <sub>1</sub> + 7 <sub>1</sub>                                        | $A_1$    | 2817.8                     |
| 201-202 | 0          | 4 <sub>1</sub> + 11 <sub>1</sub> , 10 <sub>1</sub> + 7 <sub>1</sub>    | $E$      | 2629.9                     | 256-257 | 0,2        | [11 <sub>1</sub> + 7 <sub>1</sub> , 6 <sub>2</sub> ]                    | $E$      | 2819.1                     |
| 203-204 | 0,2        | [6 <sub>2</sub> , 6 <sub>1</sub> + 11 <sub>1</sub> ]                   | $E$      | 2650.0                     | 258-259 | 0          | [10 <sub>1</sub> + 11 <sub>1</sub> , 10 <sub>1</sub> + 7 <sub>1</sub> ] | $E$      | 2836.3                     |
| 205-206 | 4          | 6 <sub>1</sub>                                                         | $E$      | 2667.3                     | 260     | 2          | 5 <sub>1</sub> + 8 <sub>1</sub>                                         | $A_1$    | 2836.8                     |
| 207     | 0          | [6 <sub>2</sub> , 6 <sub>1</sub> + 11 <sub>1</sub> ]                   | $A_1$    | 2669.9                     |         |            |                                                                         |          |                            |

<sup>a</sup> 2566.163,2566.179

TABLE S7. Vibrational states of CH<sub>3</sub>OH... [Table S6 continued]

| #       | $\nu_\tau$ | SAMs                                                                   | $\Gamma$              | $\tilde{\nu}_{\text{PES}}$ | $\delta$ | $\tilde{\nu}_{\text{exp}}$ |
|---------|------------|------------------------------------------------------------------------|-----------------------|----------------------------|----------|----------------------------|
| 261-262 | 5          | 8 <sub>1</sub>                                                         | <i>E</i>              | 2837.3                     |          |                            |
| 263-264 | 4          | 4 <sub>1</sub> , 10 <sub>1</sub>                                       | <i>E</i>              | 2841.7                     |          |                            |
| 265     | 0          | 3 <sub>1</sub> , 5 <sub>2</sub>                                        | <i>A</i> <sub>1</sub> | 2841.8                     | [3.0]    | <sup>a</sup> 2844.7 5      |
| 266-267 | 4          | 5 <sub>1</sub>                                                         | <i>E</i>              | 2845.1                     |          |                            |
| 268-269 | 0          | [3 <sub>1</sub> , 5 <sub>2</sub> ]                                     | <i>E</i>              | 2850.7                     | [3.1]    | <sup>a</sup> 2853.8 5      |
| 270-271 | 2          | 4 <sub>1</sub> + 8 <sub>1</sub>                                        | <i>E</i>              | 2862.0                     |          |                            |
| 272-273 | 2          | [7 <sub>2</sub> , 11 <sub>2</sub> ]                                    | <i>E</i>              | 2867.8                     |          |                            |
| 274-275 | 1          | 5 <sub>1</sub> + 7 <sub>1</sub> , 5 <sub>1</sub> + 11 <sub>1</sub>     | <i>E</i>              | 2870.7                     |          |                            |
| 276     | 4          | 10 <sub>1</sub> , 4 <sub>1</sub>                                       | <i>A</i> <sub>2</sub> | 2878.6                     |          |                            |
| 277     | 4          | 4 <sub>1</sub> , 10 <sub>1</sub>                                       | <i>A</i> <sub>1</sub> | 2879.6                     |          |                            |
| 278-279 | 1          | 4 <sub>1</sub> + 11 <sub>1</sub> , 10 <sub>1</sub> + 7 <sub>1</sub>    | <i>E</i>              | 2888.7                     |          |                            |
| 280     | 1          | [4 <sub>1</sub> + 7 <sub>1</sub> , 10 <sub>1</sub> + 11 <sub>1</sub> ] | <i>A</i> <sub>2</sub> | 2891.9                     |          |                            |
| 281     | 1          | [10 <sub>1</sub> + 7 <sub>1</sub> , 4 <sub>1</sub> + 11 <sub>1</sub> ] | <i>A</i> <sub>1</sub> | 2892.9                     | [0.3]    | <sup>b</sup> 2893.2 7      |
| 282-283 | 2          | [6 <sub>1</sub> + 7 <sub>1</sub> , 6 <sub>1</sub> + 11 <sub>1</sub> ]  | <i>E</i>              | 2900.4                     |          |                            |
| 284-285 | 0          | 4 <sub>1</sub> + 5 <sub>1</sub> , 10 <sub>1</sub> + 5 <sub>1</sub>     | <i>E</i>              | 2913.2                     | [-3]     | <sup>c</sup> 2910 7        |
| 286     | 0          | [4 <sub>1</sub> + 5 <sub>1</sub> , 10 <sub>1</sub> + 5 <sub>1</sub> ]  | <i>A</i> <sub>2</sub> | 2917.8                     | [-6]     | 2912 7                     |
| 287     | 0          | 5 <sub>2</sub>                                                         | <i>A</i> <sub>1</sub> | 2920.9                     |          |                            |
| 288-289 | 0,2        | [10 <sub>1</sub> + 5 <sub>1</sub> , 5 <sub>1</sub> + 11 <sub>1</sub> ] | <i>E</i>              | 2921.5                     |          |                            |
| 290-291 | 2          | 5 <sub>1</sub> + 7 <sub>1</sub> , 5 <sub>1</sub> + 11 <sub>1</sub>     | <i>E</i>              | 2923.1                     |          |                            |
| 292     | 0          | [4 <sub>1</sub> + 5 <sub>1</sub> , 4 <sub>1</sub> + 10 <sub>1</sub> ]  | <i>A</i> <sub>1</sub> | 2928.4                     | [1.1]    | 2929.5 7                   |
| 293-294 | 0          | [10 <sub>1</sub> + 5 <sub>1</sub> , 2 <sub>1</sub> ]                   | <i>E</i>              | 2930.3                     |          |                            |
| 295-296 | 0          | 5 <sub>2</sub> , 4 <sub>2</sub>                                        | <i>E</i>              | 2931.6                     |          |                            |
| 297     | 0          | 4 <sub>1</sub> + 5 <sub>1</sub> , 10 <sub>1</sub> + 5 <sub>1</sub>     | <i>A</i> <sub>2</sub> | 2933.9                     |          |                            |
| 298-299 | 2          | [4 <sub>1</sub> + 11 <sub>1</sub> , 10 <sub>1</sub> + 7 <sub>1</sub> ] | <i>E</i>              | 2934.1                     |          |                            |
| 300     | 3          | 7 <sub>1</sub> + 8 <sub>1</sub> , 11 <sub>1</sub> + 8 <sub>1</sub>     | <i>A</i> <sub>1</sub> | 2935.1                     |          |                            |
| 301     | 3          | 7 <sub>1</sub> + 8 <sub>1</sub> , 11 <sub>1</sub> + 8 <sub>1</sub>     | <i>A</i> <sub>2</sub> | 2935.3                     |          |                            |
| 302-303 | 0          | [4 <sub>1</sub> + 10 <sub>1</sub> , 4 <sub>2</sub> ]                   | <i>E</i>              | 2938.5                     |          |                            |
| 304     | 0          | 4 <sub>1</sub> + 10 <sub>1</sub>                                       | <i>A</i> <sub>1</sub> | 2939.2                     |          |                            |
| 305     | 1          | 6 <sub>2</sub>                                                         | <i>A</i> <sub>2</sub> | 2940.3                     |          |                            |
| 306-307 | 1,2        | [6 <sub>1</sub> + 7 <sub>1</sub> , 11 <sub>1</sub> + 7 <sub>1</sub> ]  | <i>E</i>              | 2948.1                     |          |                            |
| 308     | 2          | 4 <sub>1</sub> + 7 <sub>1</sub> , 10 <sub>1</sub> + 11 <sub>1</sub>    | <i>A</i> <sub>1</sub> | 2952.2                     |          |                            |
| 309     | 2          | 10 <sub>1</sub> + 7 <sub>1</sub> , 4 <sub>1</sub> + 11 <sub>1</sub>    | <i>A</i> <sub>2</sub> | 2956.1                     |          |                            |
| 310     | 0          | [4 <sub>2</sub> , 10 <sub>2</sub> ]                                    | <i>A</i> <sub>1</sub> | 2957.0                     | [1.4]    | <sup>a</sup> 2958.4 5      |
| 311-312 | 0          | [4 <sub>1</sub> + 10 <sub>1</sub> , 2 <sub>1</sub> , 9 <sub>1</sub> ]  | <i>E</i>              | 2959.1                     | [2.1]    | 2961.2 8                   |
| 313     | 0          | [4 <sub>1</sub> + 10 <sub>1</sub> , 2 <sub>1</sub> , 9 <sub>1</sub> ]  | <i>A</i> <sub>2</sub> | 2964.2                     | [2.5]    | 2966.7 8                   |
| 314-315 | 0          | [4 <sub>2</sub> , 10 <sub>2</sub> ]                                    | <i>E</i>              | 2964.7                     | [2.0]    | <sup>a</sup> 2966.7 5      |
| 316-317 | 5          | 7 <sub>1</sub> , 11 <sub>1</sub>                                       | <i>E</i>              | 2965.0                     |          |                            |
| 318     | 2          | 6 <sub>2</sub>                                                         | <i>A</i> <sub>1</sub> | 2966.6                     |          |                            |
| 319     | 5          | 7 <sub>1</sub> , 11 <sub>1</sub>                                       | <i>A</i> <sub>2</sub> | 2974.3                     |          |                            |
| 320     | 5          | 11 <sub>1</sub> , 7 <sub>1</sub>                                       | <i>A</i> <sub>1</sub> | 2974.3                     |          |                            |
| 321-322 | 2          | [6 <sub>2</sub> , 6 <sub>1</sub> + 7 <sub>1</sub> ]                    | <i>E</i>              | 2975.3                     |          |                            |
| 323-324 | 3          | [7 <sub>1</sub> + 8 <sub>1</sub> , 11 <sub>1</sub> + 8 <sub>1</sub> ]  | <i>E</i>              | 2989.0                     |          |                            |
| 325     | 1          | 5 <sub>1</sub> + 6 <sub>1</sub>                                        | <i>A</i> <sub>2</sub> | 2989.3                     |          |                            |
| 326-327 | 2          | 5 <sub>1</sub> + 8 <sub>1</sub>                                        | <i>E</i>              | 2994.7                     |          |                            |
| 328     | 2          | 5 <sub>1</sub> + 6 <sub>1</sub>                                        | <i>A</i> <sub>1</sub> | 2995.1                     |          |                            |
| 329-330 | 0          | [2 <sub>1</sub> , 9 <sub>1</sub> ]                                     | <i>E</i>              | 2999.8                     | [3.9]    | 3003.7 9                   |
| 331     | 0          | 9 <sub>1</sub> , 2 <sub>1</sub>                                        | <i>A</i> <sub>1</sub> | 3002.9                     | [4.1]    | 3007.0 9                   |

<sup>a</sup> The values listed in Table I of Ref. 5 are shifted by the zero-point energy of 128.1 cm<sup>-1</sup>, taken from in Ref. 8.<sup>b</sup> The assignment of Ref. 7 is 5<sub>2</sub>.<sup>c</sup> The assignment of Ref. 7 is 10<sub>2</sub>.

TABLE S8. Vibrational states of CH<sub>3</sub>OH... [Table S7 continued]

| #       | $\nu_\tau$ | SAMs                       | $\Gamma$              | $\tilde{\nu}_{\text{PES}}$ | #       | $\nu_\tau$ | SAMs                                  | $\Gamma$              | $\tilde{\nu}_{\text{PES}}$ |
|---------|------------|----------------------------|-----------------------|----------------------------|---------|------------|---------------------------------------|-----------------------|----------------------------|
| 332-333 | 1          | $4_1 + 6_1, 10_1 + 6_1$    | <i>E</i>              | 3003.8                     | 382     | 3,2        | $[11_1 + 7_1, 6_1 + 11_1]$            | <i>A</i> <sub>1</sub> | 3157.4                     |
| 334-335 | 2          | $4_1 + 8_1, 10_1 + 8_1$    | <i>E</i>              | 3006.6                     | 383-384 | 1          | $[4_2, 3_1]$                          | <i>E</i>              | 3158.9                     |
| 336-337 | 2          | $[4_1 + 6_1, 4_1 + 11_1]$  | <i>E</i>              | 3019.0                     | 385     | 3          | $6_1 + 7_1, 6_1 + 11_1$               | <i>A</i> <sub>2</sub> | 3159.3                     |
| 338-339 | 1          | $[5_1 + 6_1, 5_1 + 6_1]$   | <i>E</i>              | 3021.2                     | 386     | 3          | $6_1 + 11_1, 6_1 + 7_1$               | <i>A</i> <sub>1</sub> | 3160.9                     |
| 340-341 | 3          | $6_1 + 8_1$                | <i>E</i>              | 3025.6                     | 387     | 2          | $[5_1 + 11_1, 5_1 + 7_1]$             | <i>A</i> <sub>2</sub> | 3162.4                     |
| 342     | 2          | $4_1 + 8_1, 10_1 + 8_1$    | <i>A</i> <sub>2</sub> | 3028.2                     | 388     | 0          | $[6_1 + 7_1 + 8_1, 6_1 + 11_1 + 8_1]$ | <i>A</i> <sub>1</sub> | 3168.8                     |
| 343     | 2          | $10_1 + 8_1, 4_1 + 8_1$    | <i>A</i> <sub>1</sub> | 3030.4                     | 389-390 | 0          | $[7_1 + 8_2, 6_1 + 7_1 + 8_1]$        | <i>E</i>              | 3170.8                     |
| 344     | 1          | $[10_1 + 6_1, 4_1 + 6_1]$  | <i>A</i> <sub>2</sub> | 3034.3                     | 391     | 1          | $[4_1 + 10_1, 9_1]$                   | <i>A</i> <sub>1</sub> | 3175.8                     |
| 345     | 1          | $[10_1 + 6_1, 4_1 + 6_1]$  | <i>A</i> <sub>1</sub> | 3040.2                     | 392-393 | 1,2        | $[4_1 + 11_1, 4_1 + 10_1]$            | <i>E</i>              | 3176.7                     |
| 346-347 | 1          | $[4_1 + 6_1, 10_1 + 6_1]$  | <i>E</i>              | 3042.1                     | 394-395 | 2          | $[4_1 + 7_1, 4_1 + 11_1]$             | <i>E</i>              | 3179.2                     |
| 348-349 | 1          | $3_1, 5_2$                 | <i>E</i>              | 3056.5                     | 396     | 2          | $[5_1 + 6_1, 5_1 + 11_1]$             | <i>A</i> <sub>1</sub> | 3187.6                     |
| 350-351 | 3          | $11_1 + 7_1$               | <i>E</i>              | 3071.5                     | 397     | 1          | $2_1, 9_1$                            | <i>A</i> <sub>2</sub> | 3190.4                     |
| 352     | 0          | $8_3$                      | <i>A</i> <sub>1</sub> | 3077.7                     | 398-399 | 2          | $5_1 + 6_1$                           | <i>E</i>              | 3191.4                     |
| 353-354 | 5          | $6_1$                      | <i>E</i>              | 3084.7                     | 400-401 | 2          | $6_2$                                 | <i>E</i>              | 3192.6                     |
| 355-356 | 0          | $8_3$                      | <i>E</i>              | 3086.4                     | 402-403 | 2          | $4_1 + 6_1, 10_1 + 6_1$               | <i>E</i>              | 3195.1                     |
| 357-358 | 3          | $7_2, 11_2$                | <i>E</i>              | 3102.0                     | 404     | 2          | $3_1, 5_2$                            | <i>A</i> <sub>1</sub> | 3201.4                     |
| 359     | 3          | $8_2$                      | <i>A</i> <sub>2</sub> | 3102.2                     | 405-406 | 0          | $7_1 + 8_2, 11_1 + 8_2$               | <i>E</i>              | 3202.2                     |
| 360     | 4          | $8_2$                      | <i>A</i> <sub>1</sub> | 3103.2                     | 407     | 0          | $7_1 + 8_2, 11_1 + 8_2$               | <i>A</i> <sub>2</sub> | 3210.1                     |
| 361-362 | 2          | $5_1 + 7_1, 5_1 + 11_1$    | <i>E</i>              | 3107.5                     | 408-409 | 2          | $[4_1 + 6_1, 4_1 + 7_1]$              | <i>E</i>              | 3210.4                     |
| 363     | 2          | $[10_1 + 11_1, 4_1 + 7_1]$ | <i>A</i> <sub>2</sub> | 3109.0                     | 410-411 | 1          | $4_1 + 5_1$                           | <i>E</i>              | 3211.8                     |
| 364     | 2          | $[4_1 + 7_1, 10_1 + 7_1]$  | <i>A</i> <sub>1</sub> | 3110.7                     | 412     | 0          | $[6_1 + 7_2, 6_1 + 11_2]$             | <i>A</i> <sub>1</sub> | 3214.1                     |
| 365     | 1          | $10_1 + 5_1, 4_1 + 5_1$    | <i>A</i> <sub>2</sub> | 3121.2                     | 413-414 | 0          | $[6_1 + 7_2, 6_2 + 7_1]$              | <i>E</i>              | 3215.2                     |
| 366     | 0          | $[8_3, 6_1 + 8_2]$         | <i>A</i> <sub>1</sub> | 3123.5                     | 415     | 1          | $5_2$                                 | <i>A</i> <sub>2</sub> | 3215.9                     |
| 367-368 | 1          | $[4_2, 4_1 + 10_1]$        | <i>E</i>              | 3124.0                     | 416     | 2          | $4_1 + 6_1, 10_1 + 6_1$               | <i>A</i> <sub>1</sub> | 3223.6                     |
| 369     | 1          | $10_1 + 5_1, 4_1 + 5_1$    | <i>A</i> <sub>1</sub> | 3127.4                     | 417-418 | 1          | $[4_1 + 10_1, 4_2]$                   | <i>E</i>              | 3223.6                     |
| 370-371 | 0          | $[8_3, 7_1 + 8_2]$         | <i>E</i>              | 3127.9                     | 419     | 2          | $4_1 + 6_1, 10_1 + 6_1$               | <i>A</i> <sub>2</sub> | 3224.6                     |
| 372     | 1          | $3_1$                      | <i>A</i> <sub>2</sub> | 3130.6                     | 420-421 | 3          | $5_1 + 8_1$                           | <i>E</i>              | 3225.5                     |
| 373-374 | 1          | $[4_1 + 5_1, 10_1 + 5_1]$  | <i>E</i>              | 3133.4                     | 422     | 5          | $[4_1, 10_1]$                         | <i>A</i> <sub>2</sub> | 3228.2                     |
| 375-376 | 1          | $[4_2, 5_2]$               | <i>E</i>              | 3137.6                     | 423     | 5          | $[4_1, 10_1]$                         | <i>A</i> <sub>1</sub> | 3228.3                     |
| 377     | 1          | $[4_1 + 10_1, 10_1 + 5_1]$ | <i>A</i> <sub>1</sub> | 3141.3                     | 424-425 | 3,4        | $7_1 + 8_1, 11_1 + 8_1$               | <i>E</i>              | 3238.0                     |
| 378-379 | 2          | $[4_1 + 11_1, 10_1 + 7_1]$ | <i>E</i>              | 3143.4                     | 426-427 | 3          | $6_2$                                 | <i>E</i>              | 3238.7                     |
| 380     | 1,3        | $[4_1 + 10_1, 11_1 + 7_1]$ | <i>A</i> <sub>2</sub> | 3146.7                     | 428-429 | 5          | $5_1$                                 | <i>E</i>              | 3247.1                     |
| 381     | 3,2        | $[11_1 + 7_1, 6_1 + 11_1]$ | <i>A</i> <sub>2</sub> | 3151.9                     | 430-431 | 0          | $[11_1 + 7_1 + 8_1, 6_1 + 7_1 + 8_1]$ | <i>E</i>              | 3247.5                     |

TABLE S9. Vibrational states of CH<sub>3</sub>OH... [Table S8 continued]

| #       | $\nu_\tau$ | SAMs                                                                                    | $\Gamma$       | $\tilde{\nu}_{\text{PES}}$ | #       | $\nu_\tau$ | SAMs                                                                                                    | $\Gamma$       | $\tilde{\nu}_{\text{PES}}$ |
|---------|------------|-----------------------------------------------------------------------------------------|----------------|----------------------------|---------|------------|---------------------------------------------------------------------------------------------------------|----------------|----------------------------|
| 432     | 1          | [3 <sub>1</sub> , 10 <sub>2</sub> ]                                                     | A <sub>2</sub> | 3248.6                     | 483     | 3          | 11 <sub>2</sub> , 7 <sub>2</sub>                                                                        | A <sub>2</sub> | 3391.0                     |
| 433     | 3          | [4 <sub>1</sub> + 8 <sub>1</sub> , 10 <sub>1</sub> + 8 <sub>1</sub> ]                   | A <sub>1</sub> | 3252.2                     | 484     | 4          | 7 <sub>2</sub> , 11 <sub>2</sub>                                                                        | A <sub>1</sub> | 3391.8                     |
| 434     | 3          | [4 <sub>1</sub> + 8 <sub>1</sub> , 10 <sub>1</sub> + 8 <sub>1</sub> ]                   | A <sub>2</sub> | 3252.2                     | 485-486 | 3          | [10 <sub>1</sub> + 11 <sub>1</sub> , 4 <sub>1</sub> + 7 <sub>1</sub> ]                                  | E              | 3393.8                     |
| 435     | 0,1        | [7 <sub>1</sub> + 8 <sub>1</sub> , 11 <sub>1</sub> + 7 <sub>1</sub> + 8 <sub>1</sub> ]  | A <sub>2</sub> | 3256.7                     | 487     | 1          | 8 <sub>3</sub>                                                                                          | A <sub>2</sub> | 3393.9                     |
| 436-437 | 3,4        | [7 <sub>1</sub> + 8 <sub>1</sub> , 11 <sub>1</sub> + 8 <sub>1</sub> ]                   | E <sup>a</sup> | 3262.2                     | 488-489 | 3          | [5 <sub>1</sub> + 7 <sub>1</sub> , 5 <sub>1</sub> + 11 <sub>1</sub> ]                                   | E              | 3397.9                     |
| 438-439 | 3          | [4 <sub>1</sub> + 8 <sub>1</sub> , 10 <sub>1</sub> + 8 <sub>1</sub> ]                   | E <sup>b</sup> | 3262.5                     | 490     | 0,1        | [6 <sub>2</sub> + 8 <sub>1</sub> , 11 <sub>1</sub> + 8 <sub>2</sub> ]                                   | A <sub>1</sub> | 3403.7                     |
| 440-441 | 1          | 2 <sub>1</sub> , 9 <sub>1</sub>                                                         | E              | 3264.6                     | 491-492 | 3          | [4 <sub>1</sub> + 11 <sub>1</sub> , 10 <sub>1</sub> + 7 <sub>1</sub> ]                                  | E <sup>f</sup> | 3405.6                     |
| 442-443 | 2          | 4 <sub>1</sub> + 5 <sub>1</sub> , 10 <sub>1</sub> + 5 <sub>1</sub>                      | E <sup>c</sup> | 3273.3                     | 493-494 | 0,1        | [6 <sub>2</sub> + 8 <sub>1</sub> , 7 <sub>2</sub> + 8 <sub>1</sub> ]                                    | E              | 3411.8                     |
| 444-445 | 7          | 0                                                                                       | E <sup>d</sup> | 3273.8                     | 495     | 2          | 4 <sub>1</sub> + 10 <sub>1</sub>                                                                        | A <sub>2</sub> | 3413.1                     |
| 446     | 5          | 8 <sub>1</sub>                                                                          | A <sub>2</sub> | 3276.3                     | 496     | 2          | 4 <sub>1</sub> + 10 <sub>1</sub>                                                                        | A <sub>1</sub> | 3415.3                     |
| 447     | 6          | 8 <sub>1</sub>                                                                          | A <sub>1</sub> | 3276.3                     | 497     | 0          | [6 <sub>1</sub> + 8 <sub>2</sub> , 7 <sub>1</sub> + 8 <sub>2</sub> ]                                    | A <sub>1</sub> | 3417.4                     |
| 448     | 2          | 5 <sub>2</sub>                                                                          | A <sub>1</sub> | 3278.9                     | 498-499 | 2          | 10 <sub>1</sub> + 5 <sub>1</sub> , 4 <sub>1</sub> + 5 <sub>1</sub>                                      | E              | 3417.9                     |
| 449-450 | 1          | 8 <sub>3</sub>                                                                          | E              | 3286.0                     | 500-501 | 5,6        | 7 <sub>1</sub> , 11 <sub>1</sub>                                                                        | E <sup>g</sup> | 3422.8                     |
| 451-452 | 2          | 4 <sub>1</sub> + 10 <sub>1</sub>                                                        | E              | 3287.4                     | 502-503 | 3,4        | 11 <sub>1</sub> + 7 <sub>1</sub>                                                                        | E <sup>h</sup> | 3425.2                     |
| 453-454 | 5          | 10 <sub>1</sub> , 4 <sub>1</sub>                                                        | E <sup>e</sup> | 3290.9                     | 504     | 3          | [4 <sub>1</sub> + 11 <sub>1</sub> , 10 <sub>1</sub> + 11 <sub>1</sub> ]                                 | A <sub>2</sub> | 3425.5                     |
| 455-456 | 0          | 6 <sub>1</sub> + 11 <sub>1</sub> + 7 <sub>1</sub> , 11 <sub>2</sub> + 7 <sub>1</sub>    | E              | 3293.5                     | 505     | 3          | [10 <sub>1</sub> + 11 <sub>1</sub> , 4 <sub>1</sub> + 11 <sub>1</sub> ]                                 | A <sub>1</sub> | 3425.9                     |
| 457     | 0          | [11 <sub>2</sub> + 7 <sub>1</sub> , 6 <sub>1</sub> + 11 <sub>1</sub> + 7 <sub>1</sub> ] | A <sub>2</sub> | 3301.9                     | 506     | 0          | [6 <sub>1</sub> + 7 <sub>1</sub> + 8 <sub>1</sub> , 6 <sub>1</sub> + 11 <sub>1</sub> + 8 <sub>1</sub> ] | A <sub>2</sub> | 3427.4                     |
| 458     | 2          | [3 <sub>1</sub> , 4 <sub>2</sub> ]                                                      | A <sub>1</sub> | 3307.6                     | 507-508 | 5,6        | [7 <sub>1</sub> , 11 <sub>1</sub> ]                                                                     | E              | 3428.6                     |
| 459     | 0          | [11 <sub>1</sub> + 7 <sub>1</sub> + 8 <sub>1</sub> , 11 <sub>2</sub> + 8 <sub>1</sub> ] | A <sub>1</sub> | 3323.4                     | 509-510 | 1          | [6 <sub>2</sub> + 8 <sub>1</sub> , 6 <sub>1</sub> + 8 <sub>2</sub> ]                                    | E              | 3431.7                     |
| 460-461 | 2          | 2 <sub>1</sub> , 9 <sub>1</sub>                                                         | E              | 3325.1                     | 511-521 | 2          | [5 <sub>2</sub> ]                                                                                       | E              | 3433.5                     |
| 462-463 | 0          | [7 <sub>2</sub> + 8 <sub>1</sub> , 11 <sub>2</sub> + 8 <sub>1</sub> ]                   | E              | 3328.9                     | 513     | 2          | 8 <sub>3</sub>                                                                                          | A <sub>1</sub> | 3435.0                     |
| 464     | 3          | 6 <sub>1</sub> + 8 <sub>1</sub>                                                         | A <sub>2</sub> | 3334.0                     | 514-515 | 3          | 5 <sub>1</sub> + 6 <sub>1</sub>                                                                         | E              | 3438.5                     |
| 465     | 4          | 6 <sub>1</sub> + 8 <sub>1</sub>                                                         | A <sub>1</sub> | 3334.2                     | 516     | 2          | 4 <sub>1</sub> + 5 <sub>1</sub> , 10 <sub>1</sub> + 5 <sub>1</sub>                                      | A <sub>2</sub> | 3439.9                     |
| 466-467 | 0          | 6 <sub>1</sub> + 8 <sub>2</sub>                                                         | E              | 3345.9                     | 517     | 2          | 10 <sub>1</sub> + 5 <sub>1</sub> , 4 <sub>1</sub> + 5 <sub>1</sub>                                      | A <sub>1</sub> | 3441.6                     |
| 468-469 | 2          | [3 <sub>1</sub> , 5 <sub>2</sub> ]                                                      | E              | 3352.6                     | 518-519 | 4          | 8 <sub>2</sub>                                                                                          | E              | 3447.1                     |
| 470     | 3          | 5 <sub>1</sub> + 7 <sub>1</sub> , 5 <sub>1</sub> + 11 <sub>1</sub>                      | A <sub>1</sub> | 3353.7                     | 520-521 | 0          | [11 <sub>2</sub> + 7 <sub>1</sub> , 7 <sub>3</sub> ]                                                    | E              | 3449.5                     |
| 471     | 3          | 5 <sub>1</sub> + 7 <sub>1</sub> , 5 <sub>1</sub> + 11 <sub>1</sub>                      | A <sub>2</sub> | 3353.7                     | 522     | 0          | [11 <sub>3</sub> , 7 <sub>3</sub> ]                                                                     | A <sub>2</sub> | 3450.1                     |
| 472-473 | 2          | 3 <sub>1</sub> , 5 <sub>2</sub>                                                         | E              | 3356.2                     | 523     | 3          | 10 <sub>1</sub> + 6 <sub>1</sub> , 4 <sub>1</sub> + 6 <sub>1</sub>                                      | A <sub>2</sub> | 3452.3                     |
| 474     | 0,1        | [6 <sub>1</sub> + 8 <sub>2</sub> , 11 <sub>1</sub> + 8 <sub>2</sub> ]                   | A <sub>1</sub> | 3358.1                     | 524     | 3          | 10 <sub>1</sub> + 6 <sub>1</sub> , 4 <sub>1</sub> + 6 <sub>1</sub>                                      | A <sub>1</sub> | 3452.7                     |
| 475     | 1          | 8 <sub>3</sub>                                                                          | A <sub>2</sub> | 3359.6                     | 525     | 0          | [6 <sub>3</sub> , 6 <sub>2</sub> + 11 <sub>1</sub> ]                                                    | A <sub>1</sub> | 3454.4                     |
| 476     | 0          | 11 <sub>1</sub> + 7 <sub>2</sub>                                                        | A <sub>1</sub> | 3367.0                     | 526-527 | 3          | 5 <sub>1</sub> + 6 <sub>1</sub>                                                                         | E              | 3456.3                     |
| 477-478 | 3,4        | 11 <sub>1</sub> + 7 <sub>1</sub>                                                        | E              | 3375.3                     | 528-529 | 2          | 3 <sub>1</sub> , 10 <sub>2</sub>                                                                        | E              | 3462.9                     |
| 479-480 | 3,4        | [11 <sub>1</sub> + 7 <sub>1</sub> , 7 <sub>2</sub> ]                                    | E              | 3381.7                     | 530-531 | 0          | [7 <sub>3</sub> , 6 <sub>3</sub> ]                                                                      | E              | 3463.5                     |
| 481-482 | 1          | 6 <sub>1</sub> + 8 <sub>2</sub>                                                         | E              | 3386.4                     |         |            |                                                                                                         |                |                            |

<sup>a</sup> 3262.157, 3262.172

<sup>b</sup> 3262.459, 3262.476

<sup>c</sup> 3273.340, 3273.368

<sup>d</sup> 3273.796, 3273.809

<sup>e</sup> 3290.923, 3290.960

<sup>f</sup> 3405.636, 3405.649

<sup>g</sup> 3422.825, 3422.884

<sup>h</sup> 3425.241, 3425.260

TABLE S10. Vibrational states of CH<sub>3</sub>OH... [Table S9 continued]

| #       | $\nu_\tau$ | SAMs                                                                                                    | $\Gamma$              | $\tilde{\nu}_{\text{PES}}$ | #       | $\nu_\tau$ | SAMs                                                                                                     | $\Gamma$              | $\tilde{\nu}_{\text{PES}}$ |
|---------|------------|---------------------------------------------------------------------------------------------------------|-----------------------|----------------------------|---------|------------|----------------------------------------------------------------------------------------------------------|-----------------------|----------------------------|
| 532-533 | 1          | [7 <sub>1</sub> + 8 <sub>2</sub> , 11 <sub>1</sub> + 7 <sub>1</sub> + 8 <sub>1</sub> ]                  | <i>E</i>              | 3471.8                     | 581-582 | 0          | [4 <sub>1</sub> + 11 <sub>1</sub> + 8 <sub>1</sub> , 4 <sub>1</sub> + 8 <sub>2</sub> ]                   | <i>E</i>              | 3570.4                     |
| 534     | 2          | 2 <sub>1</sub> , 9 <sub>1</sub>                                                                         | <i>A</i> <sub>2</sub> | 3472.3                     | 583-584 | 1          | [7 <sub>2</sub> + 8 <sub>1</sub> , 11 <sub>2</sub> + 8 <sub>1</sub> ]                                    | <i>E</i>              | 3571.9                     |
| 535-536 | 3,4        | 6 <sub>1</sub> + 11 <sub>1</sub> , 6 <sub>1</sub> + 7 <sub>1</sub>                                      | <i>E</i>              | 3474.3                     | 585     | 0          | [10 <sub>1</sub> + 8 <sub>2</sub> , 4 <sub>1</sub> + 8 <sub>2</sub> ]                                    | <i>A</i> <sub>2</sub> | 3573.4                     |
| 537     | 2          | 2 <sub>1</sub> , 9 <sub>1</sub>                                                                         | <i>A</i> <sub>1</sub> | 3476.8                     | 586-587 | 1          | [11 <sub>2</sub> + 7 <sub>1</sub> , 7 <sub>3</sub> ]                                                     | <i>E</i>              | 3575.2                     |
| 538     | 2          | [2 <sub>1</sub> , 9 <sub>1</sub> ]                                                                      | <i>A</i> <sub>1</sub> | 3478.3                     | 588     | 0,2        | [6 <sub>1</sub> + 8 <sub>2</sub> , 6 <sub>2</sub> + 8 <sub>1</sub> ]                                     | <i>A</i> <sub>1</sub> | 3577.9                     |
| 539-540 | 0,1        | [6 <sub>1</sub> + 7 <sub>1</sub> + 8 <sub>1</sub> , 11 <sub>1</sub> + 8 <sub>2</sub> ]                  | <i>E</i>              | 3480.5                     | 589-590 | 0,1        | [4 <sub>1</sub> + 7 <sub>1</sub> + 8 <sub>1</sub> , 11 <sub>2</sub> + 7 <sub>1</sub> ]                   | <i>E</i>              | 3578.9                     |
| 541-542 | 3          | 10 <sub>1</sub> + 6 <sub>1</sub> , 4 <sub>1</sub> + 6 <sub>1</sub>                                      | <i>E</i> <sup>a</sup> | 3481.3                     | 591     | 0          | [10 <sub>1</sub> + 8 <sub>2</sub> , 4 <sub>1</sub> + 8 <sub>2</sub> ]                                    | <i>A</i> <sub>1</sub> | 3580.6                     |
| 543-544 | 3          | [6 <sub>2</sub> , 6 <sub>1</sub> + 11 <sub>1</sub> ]                                                    | <i>E</i>              | 3490.0                     | 592     | 0          | [5 <sub>1</sub> + 6 <sub>1</sub> + 7 <sub>1</sub> , 5 <sub>1</sub> + 6 <sub>1</sub> + 11 <sub>1</sub> ]  | <i>A</i> <sub>1</sub> | 3586.3                     |
| 545-546 | 2          | [4 <sub>1</sub> + 10 <sub>1</sub> , 2 <sub>1</sub> ]                                                    | <i>E</i>              | 3492.4                     | 593-594 | 0          | [5 <sub>1</sub> + 6 <sub>1</sub> + 11 <sub>1</sub> , 5 <sub>1</sub> + 7 <sub>2</sub> ]                   | <i>E</i>              | 3587.6                     |
| 547-548 | 3,4        | [6 <sub>2</sub> , 6 <sub>1</sub> + 7 <sub>1</sub> ]                                                     | <i>E</i>              | 3493.2                     | 595     | 1          | 6 <sub>1</sub> + 8 <sub>2</sub>                                                                          | <i>A</i> <sub>2</sub> | 3590.7                     |
| 549     | 1          | [11 <sub>3</sub> , 7 <sub>3</sub> ]                                                                     | <i>A</i> <sub>2</sub> | 3495.0                     | 596-597 | 4          | 7 <sub>1</sub> + 8 <sub>1</sub> , 11 <sub>1</sub> + 8 <sub>1</sub>                                       | <i>E</i> <sup>b</sup> | 3592.2                     |
| 550     | 0          | 5 <sub>1</sub> + 8 <sub>2</sub>                                                                         | <i>A</i> <sub>1</sub> | 3499.9                     | 598-599 | 3          | 3 <sub>1</sub> , 5 <sub>2</sub>                                                                          | <i>E</i>              | 3594.2                     |
| 551     | 1          | [6 <sub>1</sub> + 7 <sub>1</sub> + 8 <sub>1</sub> , 6 <sub>1</sub> + 11 <sub>1</sub> + 8 <sub>1</sub> ] | <i>A</i> <sub>2</sub> | 3502.7                     | 600     | 4          | [7 <sub>1</sub> + 8 <sub>1</sub> , 11 <sub>1</sub> + 8 <sub>1</sub> ]                                    | <i>A</i> <sub>2</sub> | 3594.4                     |
| 552-553 | 0          | [5 <sub>1</sub> + 8 <sub>2</sub> , 5 <sub>1</sub> + 8 <sub>2</sub> ]                                    | <i>E</i>              | 3508.2                     | 601-602 | 2          | 8 <sub>3</sub>                                                                                           | <i>E</i>              | 3596.3                     |
| 554-555 | 0,2        | [11 <sub>1</sub> + 7 <sub>1</sub> + 8 <sub>1</sub> , 6 <sub>1</sub> + 7 <sub>1</sub> + 8 <sub>1</sub> ] | <i>E</i>              | 3517.3                     | 603     | 4          | 11 <sub>1</sub> + 8 <sub>1</sub> , 7 <sub>1</sub> + 8 <sub>1</sub>                                       | <i>A</i> <sub>1</sub> | 3601.4                     |
| 556-557 | 0,2        | [7 <sub>1</sub> + 8 <sub>2</sub> , 11 <sub>1</sub> + 8 <sub>2</sub> ]                                   | <i>E</i>              | 3522.4                     | 604-605 | 1          | [11 <sub>1</sub> + 7 <sub>2</sub> , 11 <sub>3</sub> ]                                                    | <i>E</i>              | 3603.2                     |
| 558     | 3          | 5 <sub>1</sub> + 8 <sub>1</sub>                                                                         | <i>A</i> <sub>2</sub> | 3526.3                     | 606     | 4          | [11 <sub>1</sub> + 8 <sub>1</sub> , 7 <sub>1</sub> + 8 <sub>1</sub> ]                                    | <i>A</i> <sub>1</sub> | 3605.7                     |
| 559     | 4          | 5 <sub>1</sub> + 8 <sub>1</sub>                                                                         | <i>A</i> <sub>1</sub> | 3527.1                     | 607-608 | 1,2        | [7 <sub>1</sub> + 8 <sub>2</sub> , 11 <sub>1</sub> + 7 <sub>1</sub> + 8 <sub>1</sub> ]                   | <i>E</i>              | 3608.0                     |
| 560-561 | 0          | 4 <sub>1</sub> + 8 <sub>2</sub> , 10 <sub>1</sub> + 8 <sub>2</sub>                                      | <i>E</i>              | 3527.9                     | 609-610 | 0          | [10 <sub>1</sub> + 6 <sub>1</sub> + 7 <sub>1</sub> , 10 <sub>1</sub> + 7 <sub>2</sub> ]                  | <i>E</i>              | 3610.4                     |
| 562-563 | 1,2        | [7 <sub>1</sub> + 8 <sub>2</sub> , 11 <sub>1</sub> + 8 <sub>2</sub> ]                                   | <i>E</i>              | 3530.2                     | 611     | 4          | 7 <sub>1</sub> + 8 <sub>1</sub> , 11 <sub>1</sub> + 8 <sub>1</sub>                                       | <i>A</i> <sub>2</sub> | 3611.4                     |
| 564-565 | 3,4        | 4 <sub>1</sub> + 8 <sub>1</sub> , 10 <sub>1</sub> + 8 <sub>1</sub>                                      | <i>E</i>              | 3533.4                     | 612     | 0          | [4 <sub>1</sub> + 6 <sub>1</sub> + 11 <sub>1</sub> , 10 <sub>1</sub> + 6 <sub>1</sub> + 7 <sub>1</sub> ] | <i>A</i> <sub>2</sub> | 3612.1                     |
| 566     | 0          | 10 <sub>1</sub> + 8 <sub>2</sub> , 4 <sub>1</sub> + 8 <sub>2</sub>                                      | <i>A</i> <sub>2</sub> | 3535.5                     | 613     | 2          | 6 <sub>1</sub> + 8 <sub>2</sub>                                                                          | <i>A</i> <sub>1</sub> | 3616.2                     |
| 567     | 1          | [6 <sub>2</sub> + 11 <sub>1</sub> , 6 <sub>2</sub> + 7 <sub>1</sub> ]                                   | <i>A</i> <sub>1</sub> | 3536.2                     | 614-615 | 0          | [10 <sub>1</sub> + 6 <sub>1</sub> + 11 <sub>1</sub> , 10 <sub>1</sub> + 11 <sub>2</sub> ]                | <i>E</i>              | 3619.0                     |
| 568-569 | 0          | 4 <sub>1</sub> + 8 <sub>2</sub> , 10 <sub>1</sub> + 8 <sub>2</sub>                                      | <i>E</i>              | 3537.9                     | 616     | 0          | [10 <sub>1</sub> + 6 <sub>1</sub> + 11 <sub>1</sub> , 4 <sub>1</sub> + 6 <sub>1</sub> + 7 <sub>1</sub> ] | <i>A</i> <sub>1</sub> | 3621.0                     |
| 570     | 0          | 10 <sub>1</sub> + 8 <sub>2</sub> , 4 <sub>1</sub> + 8 <sub>2</sub>                                      | <i>A</i> <sub>1</sub> | 3541.0                     | 617-618 | 0          | [5 <sub>1</sub> + 11 <sub>1</sub> + 8 <sub>1</sub> , 5 <sub>1</sub> + 7 <sub>1</sub> + 8 <sub>1</sub> ]  | <i>E</i>              | 3621.2                     |
| 571     | 0          | [5 <sub>1</sub> + 6 <sub>1</sub> + 8 <sub>1</sub> , 5 <sub>1</sub> + 7 <sub>1</sub> + 8 <sub>1</sub> ]  | <i>A</i> <sub>1</sub> | 3544.5                     | 619     | 0          | 5 <sub>1</sub> + 11 <sub>1</sub> + 8 <sub>1</sub> , 5 <sub>1</sub> + 7 <sub>1</sub> + 8 <sub>1</sub>     | <i>A</i> <sub>2</sub> | 3627.4                     |
| 572     | 0,1        | [11 <sub>2</sub> + 7 <sub>1</sub> , 6 <sub>2</sub> + 7 <sub>1</sub> ]                                   | <i>A</i> <sub>2</sub> | 3545.3                     | 620-621 | 1          | 6 <sub>1</sub> + 8 <sub>2</sub>                                                                          | <i>E</i>              | 3628.2                     |
| 573     | 5          | 6 <sub>1</sub>                                                                                          | <i>A</i> <sub>2</sub> | 3547.6                     | 622-623 | 0,2        | [11 <sub>1</sub> + 7 <sub>1</sub> + 8 <sub>1</sub> , 11 <sub>3</sub> ]                                   | <i>E</i>              | 3630.0                     |
| 574     | 6          | 6 <sub>1</sub>                                                                                          | <i>A</i> <sub>1</sub> | 3547.7                     | 624-625 | 1,2        | [7 <sub>2</sub> + 8 <sub>1</sub> , 11 <sub>1</sub> + 7 <sub>1</sub> + 8 <sub>1</sub> ]                   | <i>E</i>              | 3639.5                     |
| 575-576 | 0          | [5 <sub>1</sub> + 7 <sub>1</sub> + 8 <sub>1</sub> , 5 <sub>1</sub> + 8 <sub>2</sub> ]                   | <i>E</i>              | 3548.1                     | 626     | 0          | 4 <sub>1</sub> + 7 <sub>1</sub> + 8 <sub>1</sub> , 10 <sub>1</sub> + 11 <sub>1</sub> + 8 <sub>1</sub>    | <i>A</i> <sub>1</sub> | 3646.3                     |
| 577     | 4          | 6 <sub>2</sub>                                                                                          | <i>A</i> <sub>1</sub> | 3561.9                     | 627-628 | 0          | [4 <sub>1</sub> + 7 <sub>1</sub> + 8 <sub>1</sub> , 10 <sub>1</sub> + 11 <sub>1</sub> + 8 <sub>1</sub> ] | <i>E</i>              | 3649.1                     |
| 578     | 3          | 6 <sub>2</sub>                                                                                          | <i>A</i> <sub>2</sub> | 3562.5                     | 629     | 0          | [4 <sub>1</sub> + 11 <sub>1</sub> + 8 <sub>1</sub> , 10 <sub>1</sub> + 7 <sub>1</sub> + 8 <sub>1</sub> ] | <i>E</i>              | 3650.7                     |
| 579-580 | 3,4        | 4 <sub>1</sub> + 8 <sub>1</sub> , 10 <sub>1</sub> + 8 <sub>1</sub>                                      | <i>E</i>              | 3565.4                     | 630-631 | 3          | [4 <sub>1</sub> + 11 <sub>1</sub> , 10 <sub>1</sub> + 7 <sub>1</sub> ]                                   | <i>E</i>              | 3650.9                     |

<sup>a</sup> 3481.281, 3481.294<sup>b</sup> 3592.206, 3592.218

TABLE S11. Vibrational states of CH<sub>3</sub>OH... [Table S10 continued]

| #       | $\nu_\tau$ | SAMs                                   | $\Gamma$ | $\tilde{\nu}_{\text{PES}}$ | $\delta$ | $\tilde{\nu}_{\text{exp}}$ |
|---------|------------|----------------------------------------|----------|----------------------------|----------|----------------------------|
| 632-633 | 3          | $4_1 + 10_1$                           | $E$      | 3651.4                     |          |                            |
| 634-635 | 3,4        | $[5_1 + 7_1, 5_1 + 11_1]$              | $E$      | 3653.8                     |          |                            |
| 636     | 3          | $10_1 + 5_1, 4_1 + 5_1$                | $A_2$    | 3654.2                     |          |                            |
| 637     | 3          | $10_1 + 5_1, 4_1 + 5_1$                | $A_1$    | 3654.6                     |          |                            |
| 638-639 | 0          | $4_1 + 11_1 + 8_1, 10_1 + 7_1 + 8_1$   | $E$      | 3657.5                     |          |                            |
| 640-641 | 0,2        | $[11_1 + 7_1 + 8_1, 6_3]$              | $E$      | 3660.9                     |          |                            |
| 642-643 | 0          | $[5_1 + 11_1 + 7_1, 5_1 + 11_2]$       | $E$      | 3665.4                     |          |                            |
| 644     | 1          | $[11_1 + 7_2, 11_3]$                   | $A_2$    | 3665.6                     |          |                            |
| 645-646 | 3          | $5_2$                                  | $E$      | 3672.9                     |          |                            |
| 647     | 0          | $6_3$                                  | $A_1$    | 3673.2                     |          |                            |
| 648     | 0,1        | $[5_1 + 11_1 + 7_1, 5_1 + 11_1 + 7_1]$ | $A_2$    | 3673.7                     |          |                            |
| 649-650 | 0          | $[6_2 + 8_1, 6_2 + 8_1]$               | $E$      | 3678.5                     |          |                            |
| 651-652 | 3,4        | $5_1 + 7_1, 5_1 + 11_1$                | $E$      | 3682.2                     |          |                            |
| 653-654 | 5,6        | $[4_1, 10_1]$                          | $E$      | 3682.3                     |          |                            |
| 655-656 | 3          | $[4_1 + 5_1, 10_1 + 5_1]$              | $E$      | 3682.7                     |          |                            |
| 657     | 3          | $[10_1 + 7_1, 4_1 + 11_1]$             | $A_1$    | 3684.8                     |          |                            |
| 658     | 3          | $4_1 + 7_1, 10_1 + 11_1$               | $A_2$    | 3685.0                     |          |                            |
| 659     | 4          | $10_1 + 11_1, 4_1 + 7_1$               | $A_1$    | 3685.3                     |          |                            |
| 660     | 0          | $1_1$                                  | $A_1$    | 3686.4                     | [-1.1]   | 3685.3 10                  |
| 661     | 0,4        | $[10_1 + 11_1 + 7_1, 10_1 + 7_1]$      | $A_2$    | 3687.5                     |          |                            |
| 662-663 | 0,2        | $[7_3, 11_3]$                          | $E$      | 3688.2                     |          |                            |
| 664     | 3          | $[2_1, 9_1]$                           | $A_2$    | 3688.6                     |          |                            |
| 665     | 3          | $[2_1, 9_1]$                           | $A_1$    | 3688.7                     |          |                            |
| 666-667 | 0          | $[4_1 + 11_1 + 7_1, 4_1 + 6_1 + 7_1]$  | $E$      | 3689.9                     |          |                            |
| 668-669 | 0          | $1_1$                                  | $E$      | 3692.6                     | [-1.0]   | 3691.6 10                  |
| 670     | 5          | $5_1$                                  | $A_2$    | 3692.7                     |          |                            |
| 671     | 6          | $5_1$                                  | $A_1$    | 3692.8                     |          |                            |
| 672-673 | 4          | $6_1 + 8_1$                            | $E$      | 3695.1                     |          |                            |
| 674     | 4          | $[4_1 + 7_1, 10_1 + 11_1]$             | $E$      | 3696.4                     |          |                            |
| 675     | 4          | $[10_1 + 7_1, 4_1 + 11_1]$             | $A_2$    | 3696.7                     |          |                            |

- 
- [1] A. Sunaga, T. Gyóri, G. Czakó, and E. Mátyus, Exact quantum dynamics of methanol: Full-dimensional ab initio potential energy surface of spectroscopic quality and variational vibrational states, *J. Chem. Phys.* **163**, 064101 (2025).
  - [2] I. Batatia, D. P. Kovacs, G. Simm, C. Ortner, and G. Csanyi, MACE: Higher order equivariant message passing neural networks for fast and accurate force fields, in *Advances in Neural Information Processing Systems*, Vol. 35, edited by S. Koyejo, S. Mohamed, A. Agarwal, D. Belgrave, K. Cho, and A. Oh (Curran Associates, Inc., 2022) pp. 11423–11436.
  - [3] A. Sunaga, G. Avila, and E. Mátyus, Variational vibrational states of methanol (12D), *J. Chem. Theory Comput.* **20**, 8100 (2024).
  - [4] D. F. Dinu, K. Oenen, J. Schlagin, M. Podewitz, H. Grothe, T. Loerting, and K. R. Liedl, How vibrational notations can spoil infrared spectroscopy: A case study on isolated methanol, *ACS Phys. Chem. Au* **4**, 679 (2024).
  - [5] X. Wang and D. S. Perry, An internal coordinate model of coupling between the torsion and C–H vibrations in methanol, *J. Chem. Phys.* **109**, 10795 (1998).
  - [6] T. N. Clasp and D. S. Perry, Torsion-vibration coupling in methanol: the adiabatic approximation and intramolecular vibrational redistribution scaling, *J. Chem. Phys.* **125**, 104313 (2006).
  - [7] A. Serrallach, R. Meyer, and H. Günthard, Methanol and deuterated species: Infrared data, valence force field, rotamers, and conformation, *J. Mol. Spectrosc.* **52**, 94 (1974).
  - [8] V. Hänninen, M. Horn, and L. Halonen, Torsional motion and vibrational overtone spectroscopy of methanol, *J. Chem. Phys.* **111**, 3018 (1999).
  - [9] L. H. Xu, X. Wang, T. J. Cronin, D. S. Perry, G. T. Fraser, and A. S. Pine, Sub-Doppler infrared spectra and torsion-rotation energy manifold of methanol in the CH-stretch fundamental region, *J. Mol. Spectrosc.* **185**, 158 (1997).
  - [10] R. H. Hunt, W. N. Shelton, F. A. Flaherty, and W. B. Cook, Torsion-rotation energy levels and the hindering potential barrier for the excited vibrational state of the OH-stretch fundamental band nu1 of methanol, *J. Mol. Spectrosc.* **192**, 277 (1998).
